# Supplementary material for: Bidirectional Best Hits Miss Many Orthologs in Duplication-Rich Clades such as Plants and Animals
Source: PubMed Central journal article supplement — Genome Biol Evol. 2013 Sep 6;5(10):1800–6. doi: 10.1093/gbe/evt132 (PMC3814191; doi:10.1093/gbe/evt132), 2013-09-06
Supplement: supp_evt132_human_mouse_tree.pdf [file supp_evt132_human_mouse_tree.pdf]

a) ancestral duplication

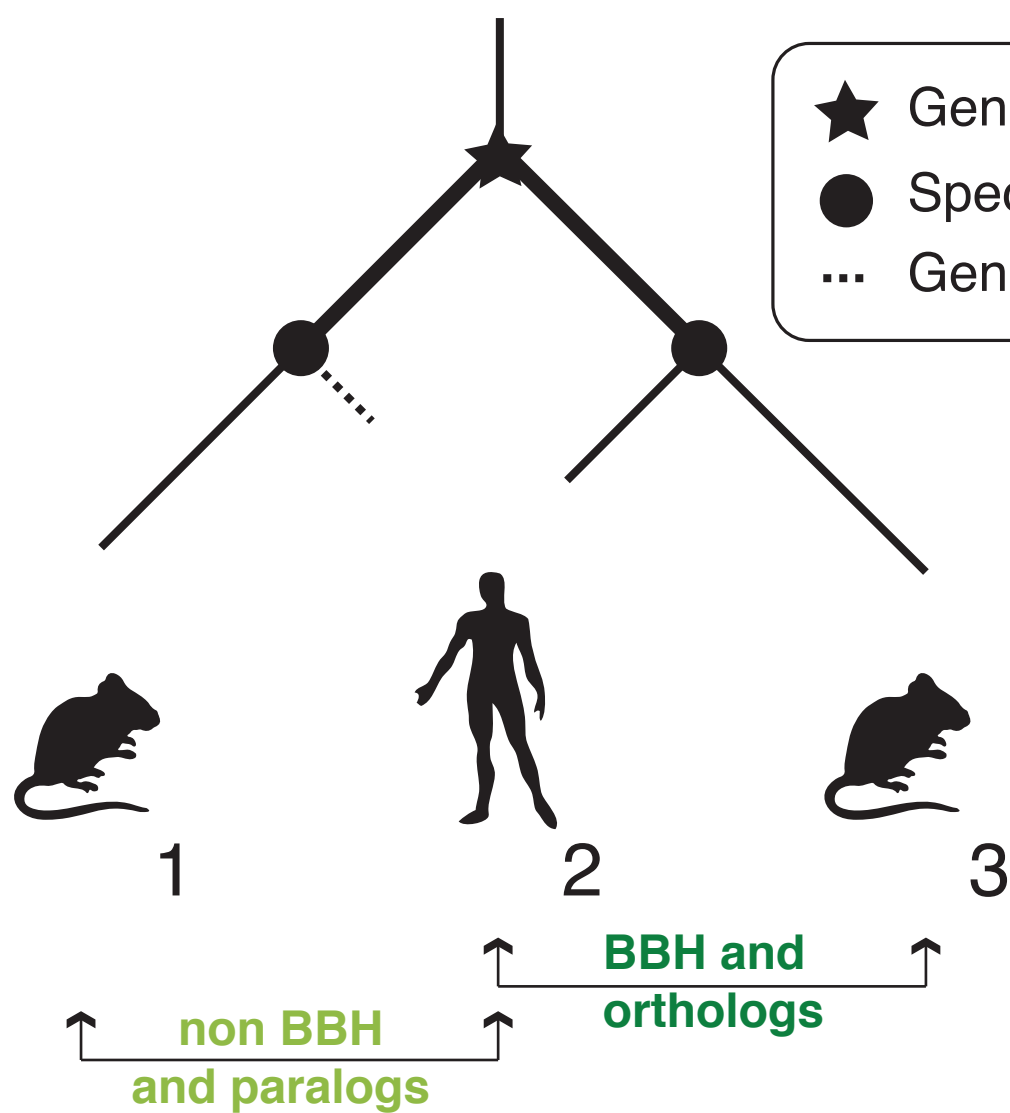

b) lineage-specific duplication

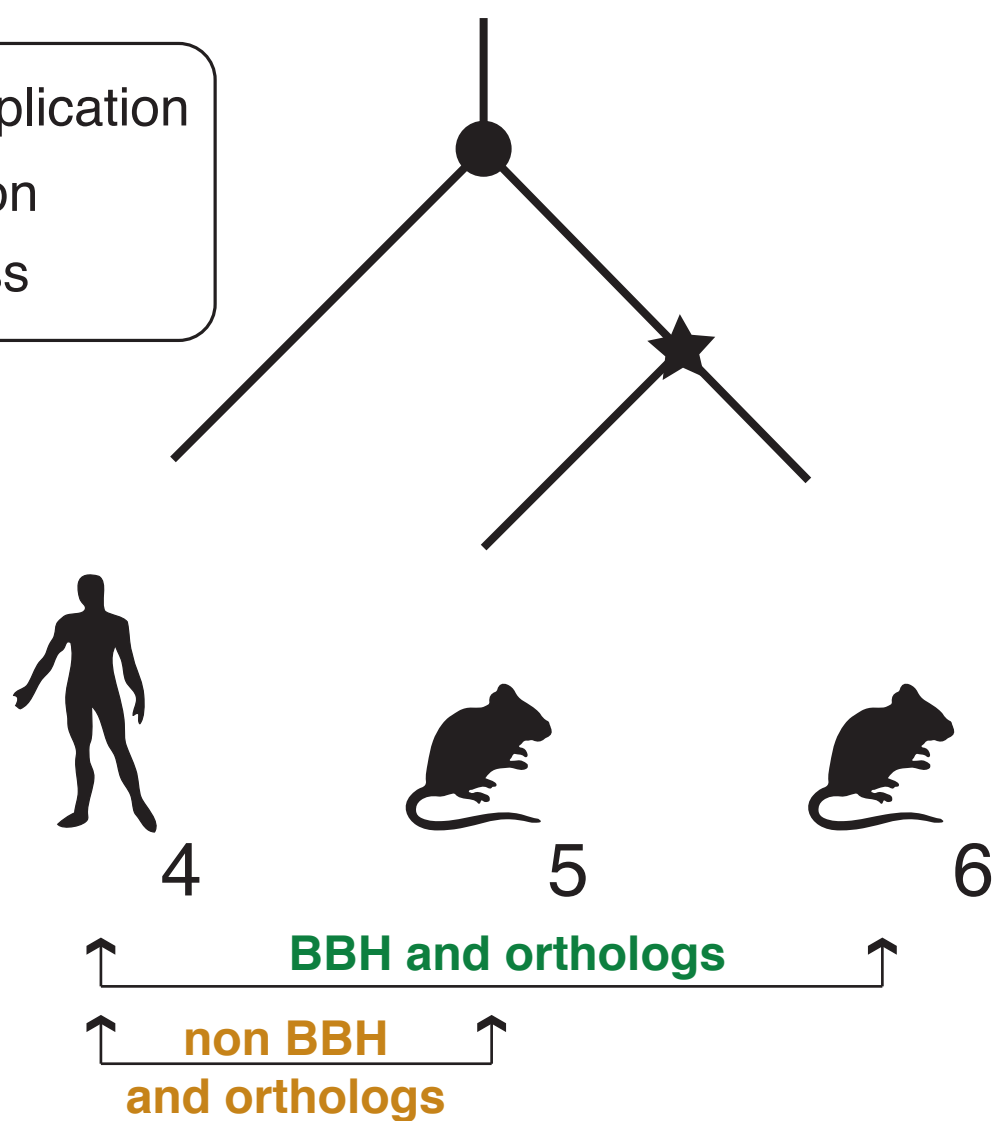

c) differential gene losses

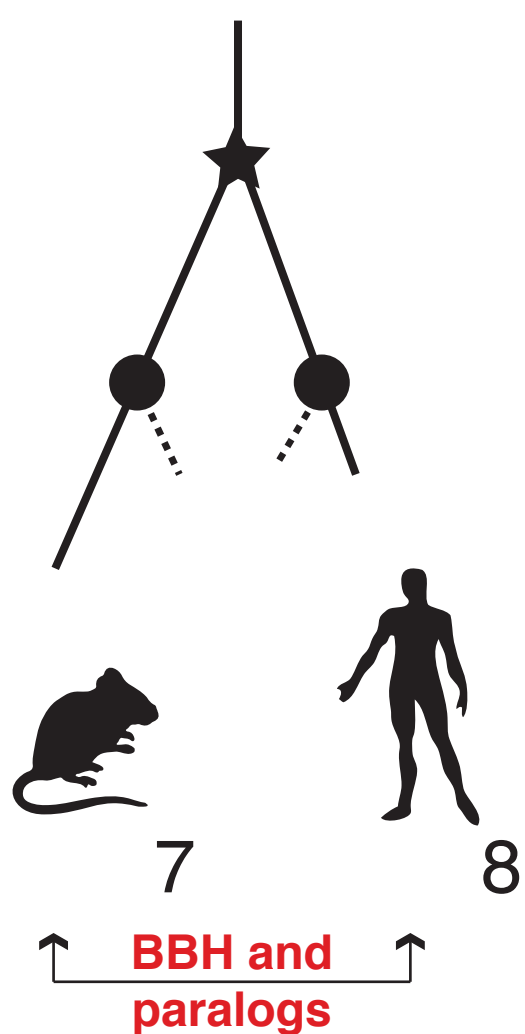

d) strong departure from molecular clock

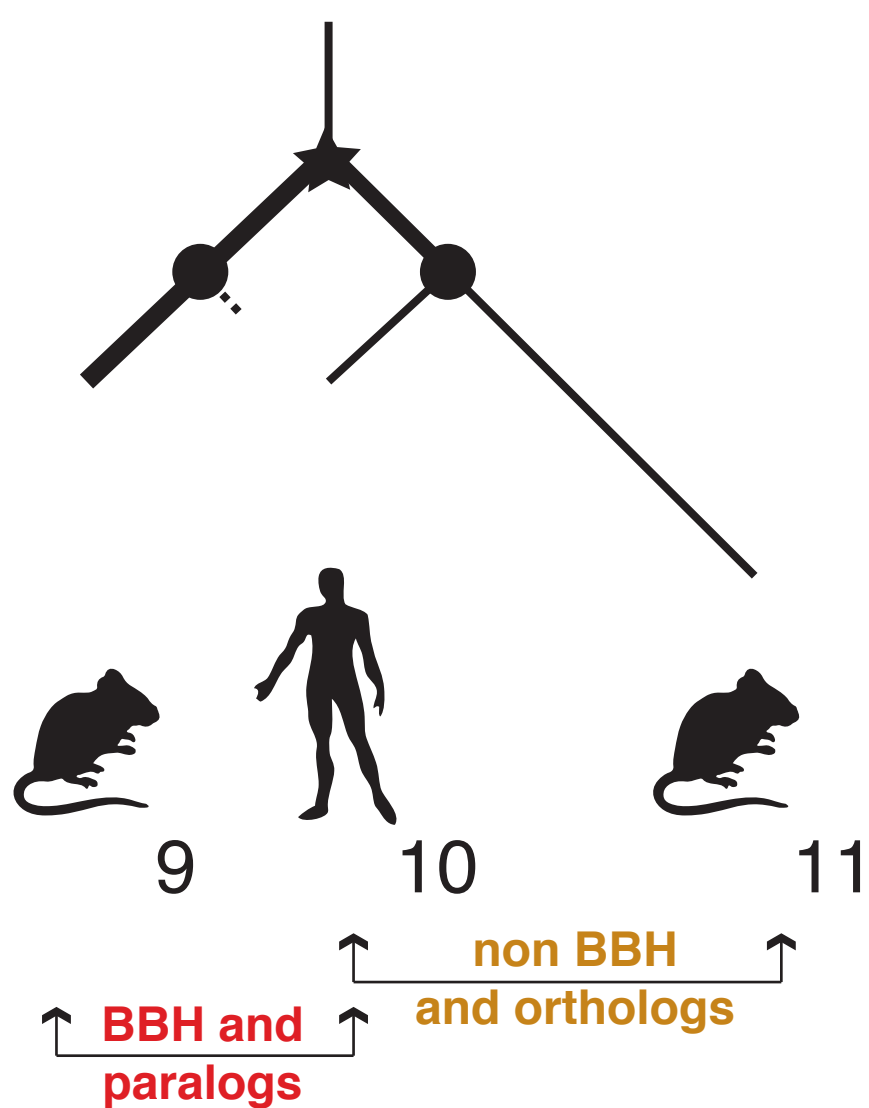

★ Gene duplication  
● Speciation  
⋯ Gene loss

true positive  
true negative  
false negative  
false positive
