# Supplementary material for: Bidirectional Best Hits Miss Many Orthologs in Duplication-Rich Clades such as Plants and Animals
Source: PubMed Central journal article supplement — Genome Biol Evol. 2013 Sep 6;5(10):1800–6. doi: 10.1093/gbe/evt132 (PMC3814191; doi:10.1093/gbe/evt132), 2013-09-06
Supplement: supp_evt132_Supplementary_Materials.pdf [file supp_evt132_Supplementary_Materials.pdf]

## Supplementary Material

### Raw datasets

All raw datasets can be downloaded from the following URL:

- [http://lab.dessimoz.org/13\\_bbh](http://lab.dessimoz.org/13_bbh)

### Additional experiments on simulated data (bacteria tree)

|                             | % Duplications  |        |       |                                   |        |       |        |
|-----------------------------|-----------------|--------|-------|-----------------------------------|--------|-------|--------|
|                             | equal loss rate |        |       | varying relative loss rate        |        |       |        |
|                             | 20              | 30     | 40    | 10                                | 30     | 30    | 40     |
| <hr/>                       |                 |        |       |                                   |        |       |        |
| <b>parameters values</b>    |                 |        |       |                                   |        |       |        |
| # of sequences              |                 |        |       | 1000                              |        |       |        |
| distr. of seq. length       |                 |        |       | $\Gamma(k = 2.4, \theta = 133.8)$ |        |       |        |
| min. sequence length        |                 |        |       | 50                                |        |       |        |
| substitution model          |                 |        |       | WAG                               |        |       |        |
| insertion and deletion rate |                 |        |       | 0.000125                          |        |       |        |
| gene duplication rate       | 0.006           | 0.0105 | 0.017 | 0.0026                            | 0.0087 | 0.009 | 0.0125 |
| gene loss rate              | 0.006           | 0.0105 | 0.017 | 0.0078                            | 0.0029 | 0.027 | 0      |
| # of species                |                 |        |       | 30                                |        |       |        |
| <hr/>                       |                 |        |       |                                   |        |       |        |
| <b>key statistics</b>       |                 |        |       |                                   |        |       |        |
| seq. length - mean          | 321.6           | 324.4  | 323.7 | 323.1                             | 317.9  | 320.9 | 324.6  |
| seq. length - stderr        | 205.5           | 210.9  | 207.1 | 208.9                             | 201.2  | 205.8 | 207.2  |
| avg. % gap chars in MSA     | 22.5            | 21.44  | 20.35 | 19.54                             | 26.48  | 12.08 | 31.11  |
| variance of % gap chars     | 68.4            | 79.4   | 90.7  | 65.2                              | 74.6   | 56.8  | 74.9   |
| total tree length           |                 |        |       | 763.6                             |        |       |        |
| minimum tree height         |                 |        |       | 31.70                             |        |       |        |
| maximum tree height         |                 |        |       | 77.80                             |        |       |        |
| average tree height         |                 |        |       | 41.36                             |        |       |        |
| average pairwise distance   |                 |        |       | 72.60                             |        |       |        |
| <hr/>                       |                 |        |       |                                   |        |       |        |

**Table 3:** Key statistics for datasets of additional experiments (bacteria tree)

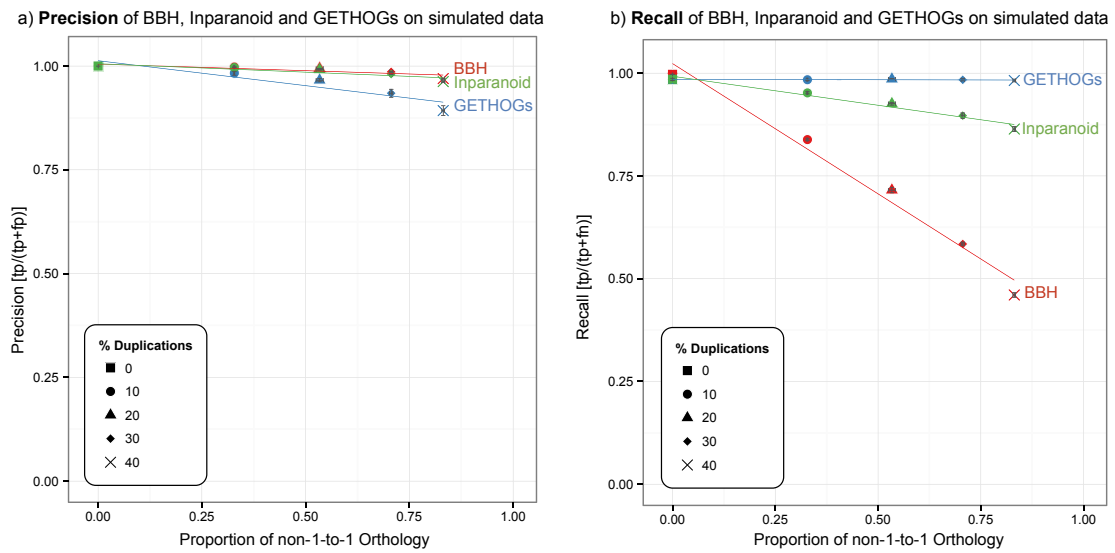

**Supplementary Figure 1: Equal duplication and loss rates.** Relationship between the proportion of non-1-to-1 orthology and precision/recall for BBH (in red) on simulated datasets with different proportions of genes with a history of duplications. Loss rates were equal to duplication rates. Results for Inparanoid (green) and OMA/GETHOGs (blue) are given for comparison. Each point corresponds to the mean value of five replicates. Error bars give the 95% confidence interval of the mean values in both dimensions.

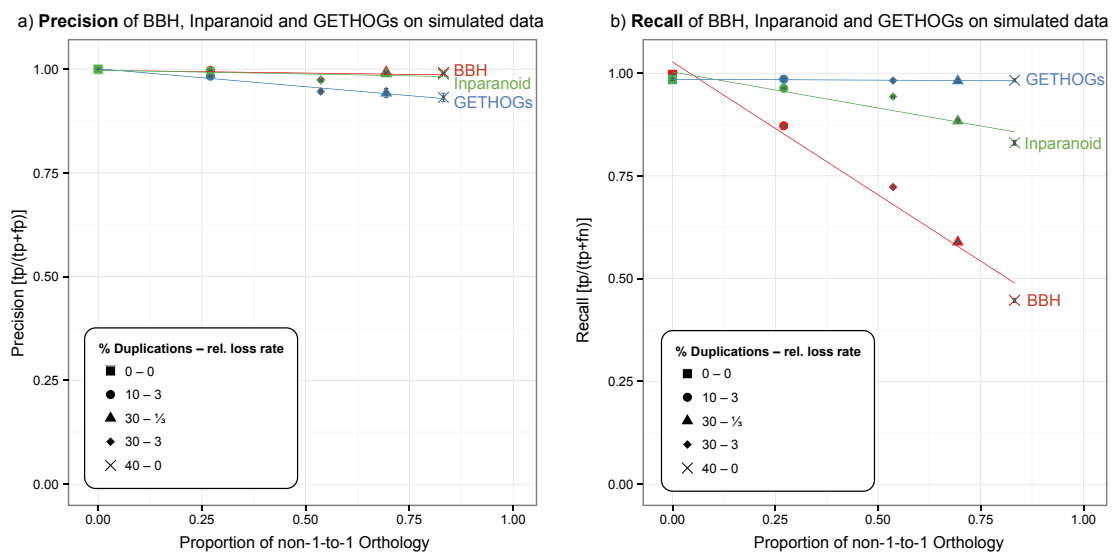

**Supplementary Figure 2: Varying relative loss rates.** Relationship between the proportion of non-1-to-1 orthology and precision/recall for BBH (in red) on simulated datasets with different proportions of genes with a history of duplications. Datasets with 10% duplications had a loss rate that was three times the duplication rate. For the datasets with 30% duplications, loss rate was either a third of or three times the duplication rate. For datasets with 40% duplications, loss rate was set to 0. Results for Inparanoid (green) and OMA/GETHOGs (blue) are given for comparison. Each point corresponds to the mean value of five replicates. Error bars give the 95% confidence interval of the mean values in both dimensions.

## Additional experiments on simulated data (mammalia-like tree)

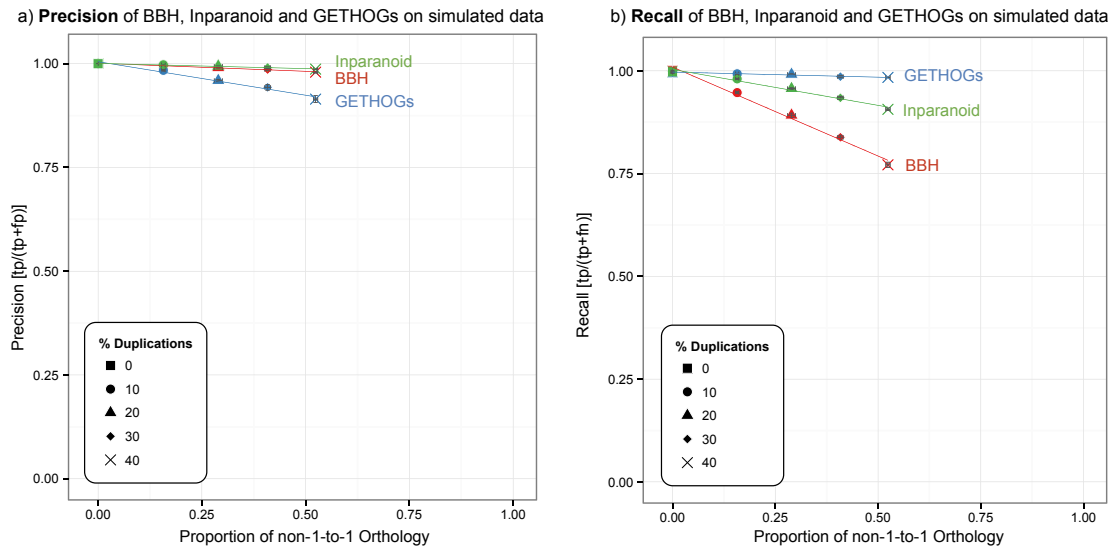

**Supplementary Figure 3: Constant loss rates.** Relationship between the proportion of non-1-to-1 orthology and precision/recall for BBH (in red) on simulated datasets with different proportions of genes with a history of duplications. Loss rate for all datasets was equal to the duplication rate of datasets with 10% duplication. Results for Inparanoid (green) and OMA/GETHOGs (blue) are given for comparison. Each point corresponds to the mean value of five replicates. Error bars give the 95% confidence interval of the mean values in both dimensions.

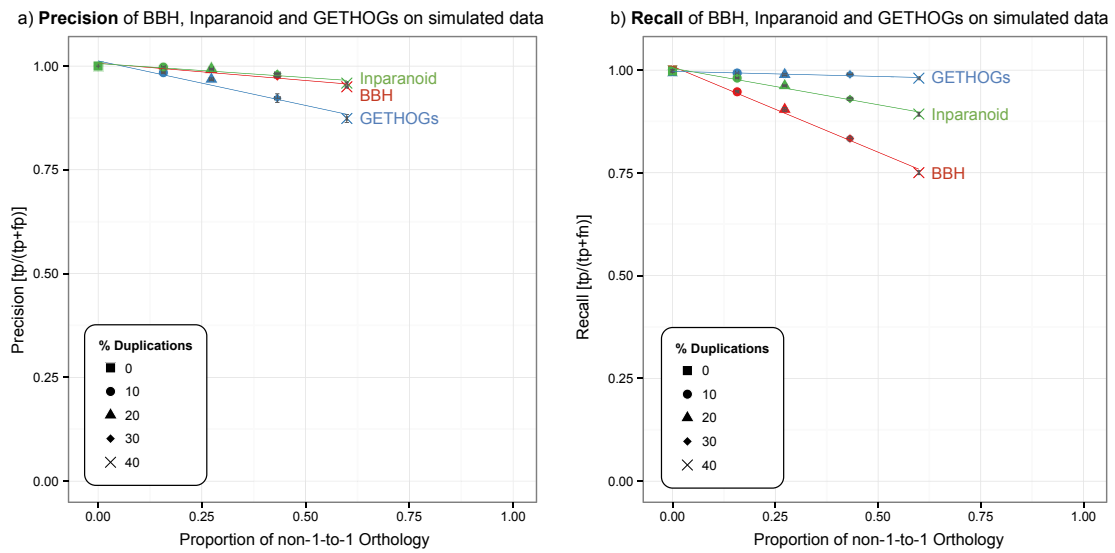

**Supplementary Figure 4: Equal duplication and loss rates.** Relationship between the proportion of non-1-to-1 orthology and precision/recall for BBH (in red) on simulated datasets with different proportions of genes with a history of duplications. Loss rates were equal to duplication rates. Results for Inparanoid (green) and OMA/GETHOGs (blue) are given for comparison. Each point corresponds to the mean value of five replicates. Error bars give the 95% confidence interval of the mean values in both dimensions.

|                             | const. loss rate |        |        |        |        | % Duplications                    |       |        |        |                            |       |       |    |
|-----------------------------|------------------|--------|--------|--------|--------|-----------------------------------|-------|--------|--------|----------------------------|-------|-------|----|
|                             | 0                | 10     | 20     | 30     | 40     | equal loss rate                   | 20    | 30     | 40     | varying relative loss rate | 10    | 30    | 40 |
| <b>parameters values</b>    |                  |        |        |        |        |                                   |       |        |        |                            |       |       |    |
| # of sequences              |                  |        |        |        |        | 1000                              |       |        |        |                            |       |       |    |
| distr. of seq. length       |                  |        |        |        |        | $\Gamma(k = 1.8, \theta = 274.1)$ |       |        |        |                            |       |       |    |
| min. sequence length        |                  |        |        |        |        | 50                                |       |        |        |                            |       |       |    |
| substitution model          |                  |        |        |        |        | WAG                               |       |        |        |                            |       |       |    |
| insertion and deletion rate |                  |        |        |        |        | 0.000125                          |       |        |        |                            |       |       |    |
| gene duplication rate       | 0                | 0.0065 | 0.013  | 0.0205 | 0.0295 | 0.013                             | 0.025 | 0.0455 | 0.0065 | 0.0201                     | 0.021 | 0.03  |    |
| gene loss rate              | 0                |        | 0.0065 |        |        | 0.013                             | 0.025 | 0.045  | 0.0195 | 0.0067                     | 0.063 | 0     |    |
| # of species                |                  |        |        |        |        | 20                                |       |        |        |                            |       |       |    |
| <b>key statistics</b>       |                  |        |        |        |        |                                   |       |        |        |                            |       |       |    |
| seq. length - mean          | 487.6            | 485.8  | 483.0  | 487.6  | 482.8  | 488.6                             | 488.1 | 495.5  | 483.9  | 483.9                      | 484.2 | 481.1 |    |
| seq. length - stderr        | 363.2            | 363.0  | 363.6  | 373.1  | 350.9  | 367.9                             | 362.5 | 369.5  | 358.5  | 364.4                      | 365.5 | 356.8 |    |
| avg. % gap chars in MSA     | 4.0              | 3.87   | 4.27   | 4.74   | 5.29   | 3.8                               | 3.86  | 3.75   | 3.26   | 4.72                       | 2.35  | 5.89  |    |
| variance of % gap chars     | 12.6             | 13.4   | 15.2   | 18.6   | 21.9   | 15.1                              | 16.4  | 18.6   | 12.0   | 18.7                       | 9.7   | 23.2  |    |
| total tree length           |                  |        |        |        |        | 101.2                             |       |        |        |                            |       |       |    |
| minimum tree height         |                  |        |        |        |        | 14.70                             |       |        |        |                            |       |       |    |
| maximum tree height         |                  |        |        |        |        | 19.18                             |       |        |        |                            |       |       |    |
| average tree height         |                  |        |        |        |        | 17.48                             |       |        |        |                            |       |       |    |
| average pairwise distance   |                  |        |        |        |        | 14.50                             |       |        |        |                            |       |       |    |

**Table 4:** Key statistics for datasets of additional experiments (mammalia-like tree)

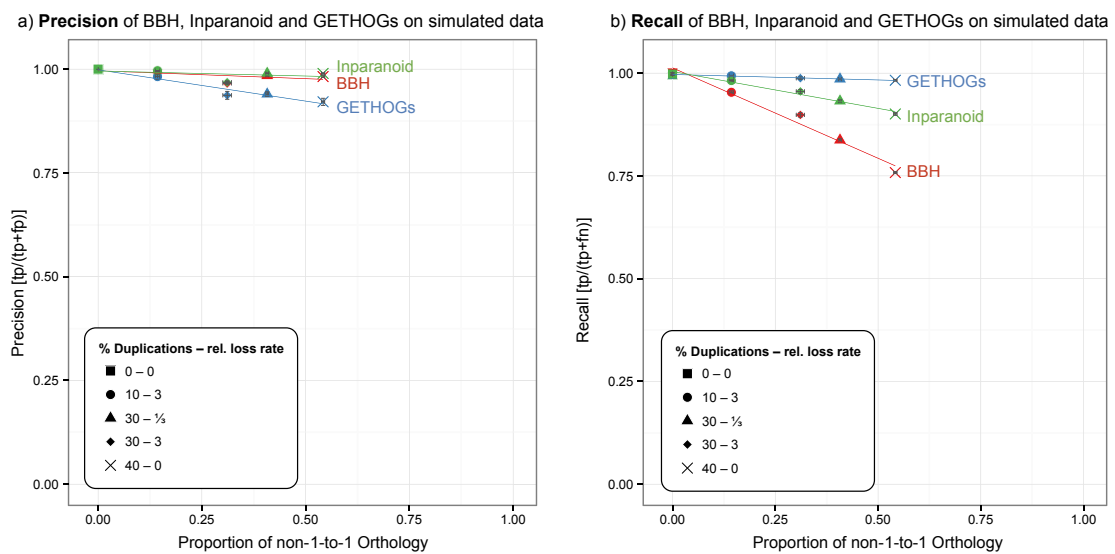

**Supplementary Figure 5: Varying relative loss rates.** Relationship between the proportion of non-1-to-1 orthology and precision/recall for BBH (in red) on simulated datasets with different proportions of genes with a history of duplications. Datasets with 10% duplications had a loss rate that was three times the duplication rate. For the datasets with 30% duplications, loss rate was either a third of or three times the duplication rate. For datasets with 40% duplications, loss rate was set to 0. Results for Inparanoid (green) and OMA/GETHOGs (blue) are given for comparison. Each point corresponds to the mean value of five replicates. Error bars give the 95% confidence interval of the mean values in both dimensions.

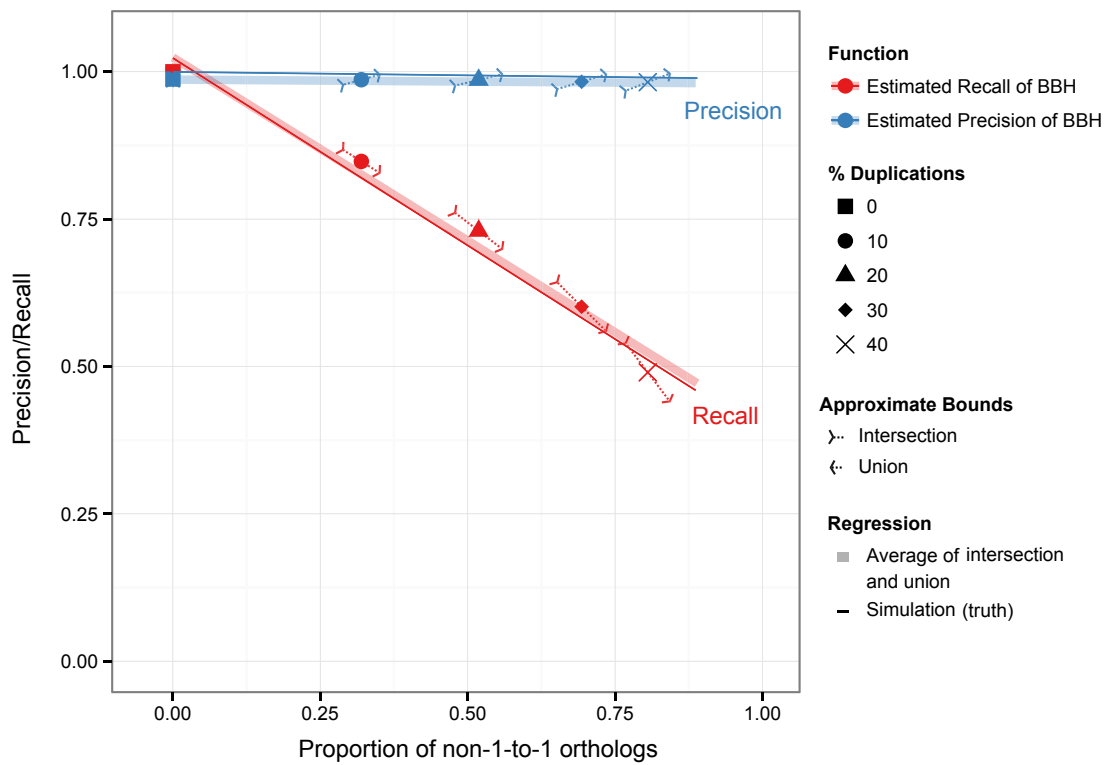

**Supplementary Figure 6: Testing the intersection/union-bound approach on simulated data** Precision and recall of BBH on simulated biological datasets, estimated from the intersection and union sets of orthologs inferred by Inparanoid and GETHOgs—the intersection yielding a lower bound and the union yielding an upper bound for precision and recall. Visually, the estimated trendlines (thick lines) coincide well with the true trendlines (slim solid lines).



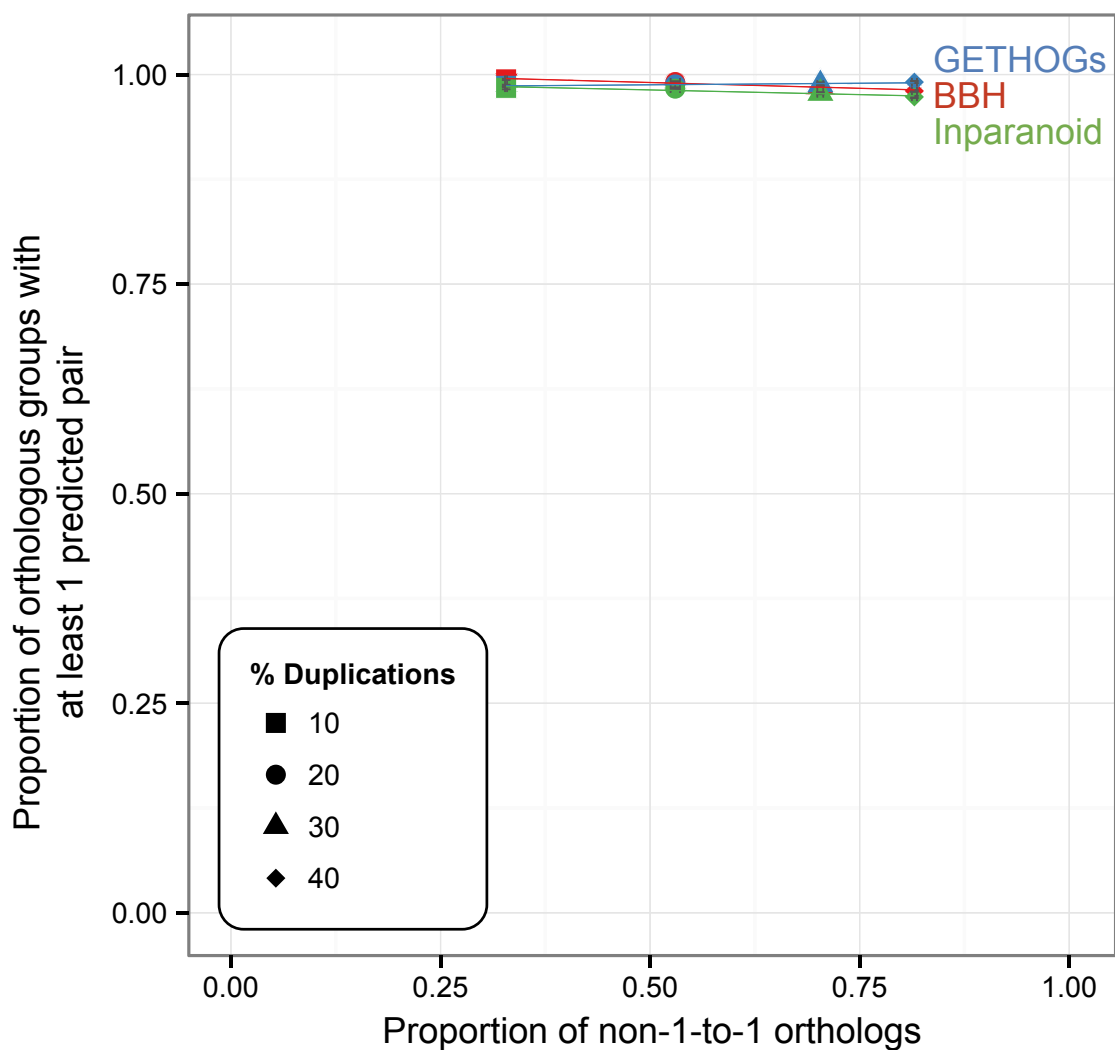

**Supplementary Figure 7:** Suitability of BBH to identify ortholog seeds (simulation). Proportion of orthologous groups—defined here as sets of n:m orthologs—for which at least one pair is predicted by BBH (red), as a function of the proportion of non-1-to-1 orthologs. Analysis on simulated datasets, with different proportions of genes with a history of duplications. Loss rate for all datasets was equal to the duplication rate of datasets with 10% duplication. Results for Inparanoid (green) and OMA/GETHOGs (blue) are given for comparison.

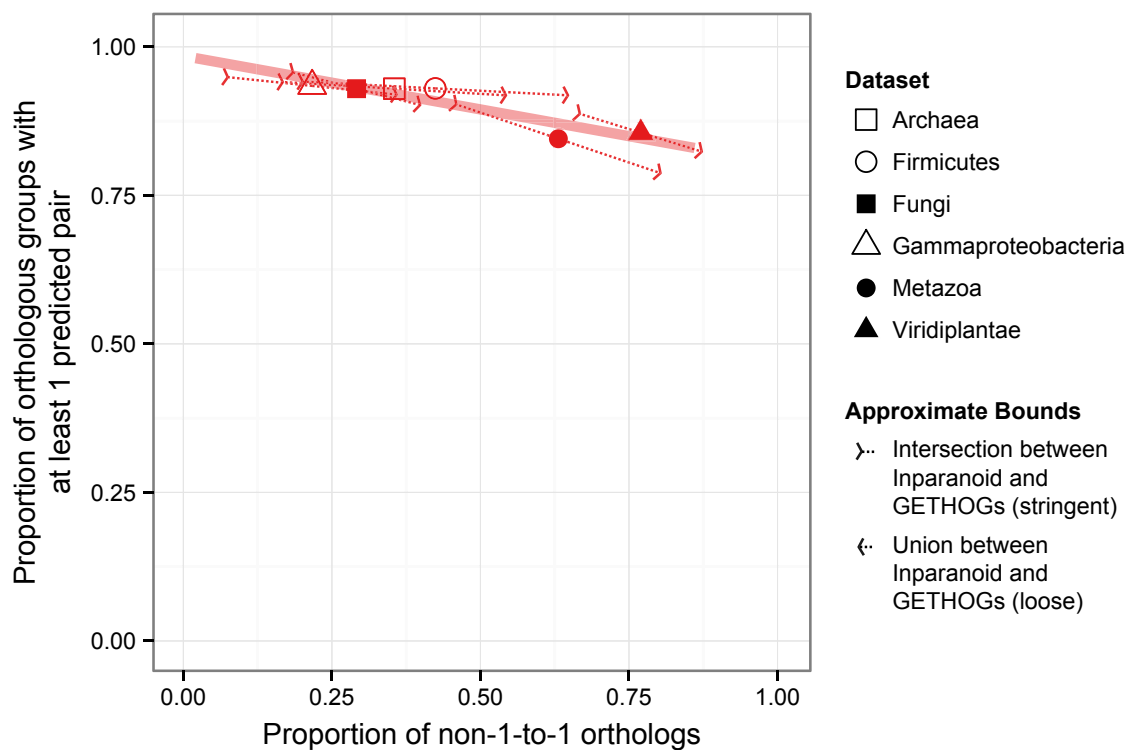

**Supplementary Figure 8:** Suitability of BBH to identify ortholog seeds (real data). Proportion of orthologous groups—defined here as sets of n:m orthologs—for which at least one pair is predicted by BBH, as a function of the proportion of non-1-to-1 orthologs. Analysis on real biological datasets, estimated from the intersection and union sets of orthologs inferred by Inparanoid and GETHOGs.

## List of Species

| <u>species</u>                                     | <u># of sequences</u> |
|----------------------------------------------------|-----------------------|
| Aciduliprofundum boonei (strain DSM 19572)         | 1539                  |
| Aeropyrum pernix (strain ATCC 700893)              | 1699                  |
| Ferroglobus placidus (strain DSM 10642)            | 2463                  |
| Haloferax volcanii (strain ATCC 29605)             | 3986                  |
| Ignisphaera aggregans (strain DSM 17230)           | 1929                  |
| Ignicoccus hospitalis (strain KIN4/I)              | 1434                  |
| Korarchaeum cryptofilum (strain OPF8)              | 1602                  |
| Methanosarcina acetivorans (strain ATCC 35395)     | 4463                  |
| Methanopyrus kandleri (strain AV19)                | 1690                  |
| Methanococcus maripaludis                          | 1849                  |
| Methanoplanus petrolearius (strain DSM 11571)      | 2779                  |
| Methanothermobacter marburgensis (strain DSM 2133) | 1755                  |
| Nanoarchaeum equitans (strain Kin4-M)              | 536                   |
| Nitrosopumilus maritimus (strain SCM1)             | 1795                  |
| Picrophilus torridus (strain ATCC 700027)          | 1535                  |
| Pyrococcus furiosus (strain ATCC 43587)            | 2052                  |
| Staphylothermus marinus (strain ATCC 43588)        | 1570                  |
| Sulfolobus islandicus (strain M.16.4)              | 2729                  |
| Thermofilum pendens (strain Hrk 5)                 | 1876                  |
| Vulcanisaeta distributa (strain DSM 14429)         | 2492                  |

**Supplementary Table 1:** List of species in archaea dataset.

| <b>species</b>                                                            | <b># of sequences</b> |
|---------------------------------------------------------------------------|-----------------------|
| Alicyclobacillus acidocaldarius subsp. acidocaldarius (strain ATCC 27009) | 3059                  |
| Alkaliphilus metalliredigens (strain QYMF)                                | 4463                  |
| Anaerococcus prevotii (strain ATCC 9321)                                  | 1795                  |
| Caldicellulosiruptor saccharolyticus (strain ATCC 43494)                  | 2619                  |
| Clostridium beijerinckii (strain ATCC 51743)                              | 5003                  |
| Clostridium cellulolyticum (strain ATCC 35319)                            | 3286                  |
| Clostridium phytofermentans (strain ATCC 700394)                          | 3889                  |
| Coprothermobacter proteolyticus (strain ATCC 35245)                       | 1481                  |
| Desulfitobacterium hafniense (strain Y51)                                 | 5015                  |
| Desulfotomaculum reducens (strain MI-1)                                   | 3214                  |
| Finegoldia magna (strain ATCC 29328)                                      | 1813                  |
| Geobacillus sp. (strain Y412MC10)                                         | 6237                  |
| Halothermothrix orenii (strain H 168)                                     | 2324                  |
| Lactobacillus acidophilus (strain ATCC 700396)                            | 1860                  |
| Leuconostoc mesenteroides subsp. mesenteroides (strain ATCC 8293)         | 2002                  |
| Moorella thermoacetica (strain ATCC 39073)                                | 2450                  |
| Natranaerobius thermophilus (strain ATCC BAA-1301)                        | 2836                  |
| Symbiobacterium thermophilum (strain T)                                   | 3312                  |
| Syntrophomonas wolfei subsp. wolfei (strain Goettingen)                   | 2471                  |
| Thermoanaerobacter sp. (strain X514)                                      | 2322                  |

**Supplementary Table 2:** List of species in firmicutes dataset.

| <b>species</b>                                            | <b># of sequences</b> |
|-----------------------------------------------------------|-----------------------|
| Agaricus bisporus                                         | 10366                 |
| Ashbya gossypii (strain ATCC 10895)                       | 4707                  |
| Neosartorya fumigata (strain ATCC MYA-4609)               | 9832                  |
| Botryotinia fuckeliana (strain B05.10)                    | 16299                 |
| Candida albicans (strain WO-1)                            | 5695                  |
| Candida glabrata (strain ATCC 2001)                       | 4752                  |
| Cryptococcus neoformans                                   | 6231                  |
| Debaryomyces hansenii (strain ATCC 36239)                 | 6263                  |
| Emericella nidulans (strain FGSC A4)                      | 10510                 |
| Encephalitozoon cuniculi (strain GB-M1)                   | 1895                  |
| Kluyveromyces lactis (strain ATCC 8585)                   | 5230                  |
| Laccaria bicolor                                          | 20052                 |
| Lodderomyces elongisporus (strain ATCC 11503)             | 5772                  |
| Magnaporthe grisea                                        | 12637                 |
| Mycosphaerella graminicola                                | 10932                 |
| Neurospora crassa (strain ATCC 24698)                     | 7569                  |
| Phaeosphaeria nodorum (strain SN15)                       | 16489                 |
| Scheffersomyces stipitis (strain ATCC 58785)              | 5799                  |
| Puccinia graminis f. sp. tritici (strain CRL 75-36-700-3) | 20364                 |
| Schizosaccharomyces pombe (strain 972)                    | 4958                  |
| Ustilago maydis (strain 521)                              | 6510                  |
| Yarrowia lipolytica (strain CLIB 122)                     | 6603                  |
| Saccharomyces cerevisiae (strain ATCC 204508)             | 6328                  |

**Supplementary Table 3:** List of species in fungi dataset.

| <b>species</b>                                                           | <b># of sequences</b> |
|--------------------------------------------------------------------------|-----------------------|
| <i>Acinetobacter baumannii</i> (strain AYE)                              | 3715                  |
| <i>Acidithiobacillus ferrooxidans</i> (strain ATCC 23270)                | 3119                  |
| <i>Alcanivorax borkumensis</i> (strain SK2)                              | 2752                  |
| <i>Baumannia cicadellinicola</i> subsp. <i>Homalodisca coagulata</i>     | 595                   |
| <i>Buchnera aphidicola</i> subsp. <i>Acyrtosiphon pisum</i> (strain APS) | 571                   |
| <i>Buchnera aphidicola</i> subsp. <i>Baizongia pistaciae</i> (strain Bp) | 507                   |
| <i>Buchnera aphidicola</i> subsp. <i>Cinara cedri</i> (strain Cc)        | 365                   |
| <i>Carsonella ruddii</i> (strain PV)                                     | 182                   |
| <i>Coxiella burnetii</i> (strain Dugway 5J108-111)                       | 2110                  |
| <i>Dichelobacter nodosus</i> (strain VCS1703A)                           | 1273                  |
| <i>Francisella tularensis</i> subsp. <i>novicida</i> (strain U112)       | 1719                  |
| <i>Legionella pneumophila</i> (strain Paris)                             | 3059                  |
| <i>Marinomonas</i> sp. (strain MWYL1)                                    | 4415                  |
| <i>Pseudomonas aeruginosa</i> (strain UCBPP-PA14)                        | 5886                  |
| <i>Ruthia magnifica</i> subsp. <i>Calyptogena magnifica</i>              | 976                   |
| <i>Shewanella baltica</i> (strain OS195)                                 | 4616                  |
| <i>Thiomicrospira crunogena</i> (strain XCL-2)                           | 2183                  |
| <i>Thioalkalivibrio</i> sp. (strain HL-EbGR7)                            | 3272                  |
| <i>Wigglesworthia glossinidia brevipalpis</i>                            | 612                   |
| <i>Xanthomonas campestris</i> pv. <i>campestris</i> (strain ATCC 33913)  | 4123                  |

**Supplementary Table 4:** List of species in Gammaproteobacteria dataset.

| <b>species</b>                                  | <b># of sequences</b> |
|-------------------------------------------------|-----------------------|
| <i>Acyrtosiphon pisum</i>                       | 33992                 |
| <i>Aedes aegypti</i>                            | 15129                 |
| <i>Apis mellifera</i>                           | 10378                 |
| <i>Bombyx mori</i>                              | 14577                 |
| <i>Branchiostoma floridae</i>                   | 28464                 |
| <i>Caenorhabditis remanei</i>                   | 31096                 |
| <i>Capitella</i> sp. 1                          | 31562                 |
| <i>Ciona intestinalis</i>                       | 15464                 |
| <i>Daphnia pulex</i>                            | 30088                 |
| <i>Drosophila virilis</i>                       | 14351                 |
| <i>Gasterosteus aculeatus</i>                   | 21832                 |
| <i>Helobdella robusta</i>                       | 23263                 |
| <i>Ixodes scapularis</i>                        | 20454                 |
| <i>Lottia gigantea</i>                          | 23514                 |
| <i>Nematostella vectensis</i>                   | 26036                 |
| <i>Pediculus humanus</i> subsp. <i>corporis</i> | 10733                 |
| <i>Pristionchus pacificus</i>                   | 29363                 |
| <i>Schistosoma mansoni</i>                      | 11404                 |
| <i>Strongylocentrotus purpuratus</i>            | 26882                 |
| <i>Trichoplax adhaerens</i>                     | 11466                 |

**Supplementary Table 5:** List of species in Metazoa dataset.

| <b>species</b>                                   | <b># of sequences</b> |
|--------------------------------------------------|-----------------------|
| <i>Arabidopsis lyrata</i>                        | 32085                 |
| <i>Arabidopsis thaliana</i>                      | 27489                 |
| <i>Chlamydomonas reinhardtii</i>                 | 16900                 |
| <i>Hordeum vulgare</i> var. <i>distichum</i>     | 29214                 |
| <i>Zea mays</i>                                  | 107258                |
| <i>Manihot esculenta</i>                         | 32737                 |
| <i>Oryza sativa</i> subsp. <i>japonica</i>       | 58246                 |
| <i>Ostreococcus lucimarinus</i> (strain CCE9901) | 7410                  |
| <i>Ostreococcus tauri</i>                        | 7860                  |
| <i>Populus trichocarpa</i>                       | 41297                 |
| <i>Sorghum bicolor</i>                           | 35447                 |
| <i>Vitis vinifera</i>                            | 26207                 |

**Supplementary Table 6:** List of species in Viridiplantae dataset.
