# Supplementary figures and images for: Bidirectional Best Hits Miss Many Orthologs in Duplication-Rich Clades such as Plants and Animals
Source: PubMed Central journal article supplement — Genome Biol Evol. 2013 Sep 6;5(10):1800–6. doi: 10.1093/gbe/evt132 (PMC3814191; doi:10.1093/gbe/evt132), 2013-09-06

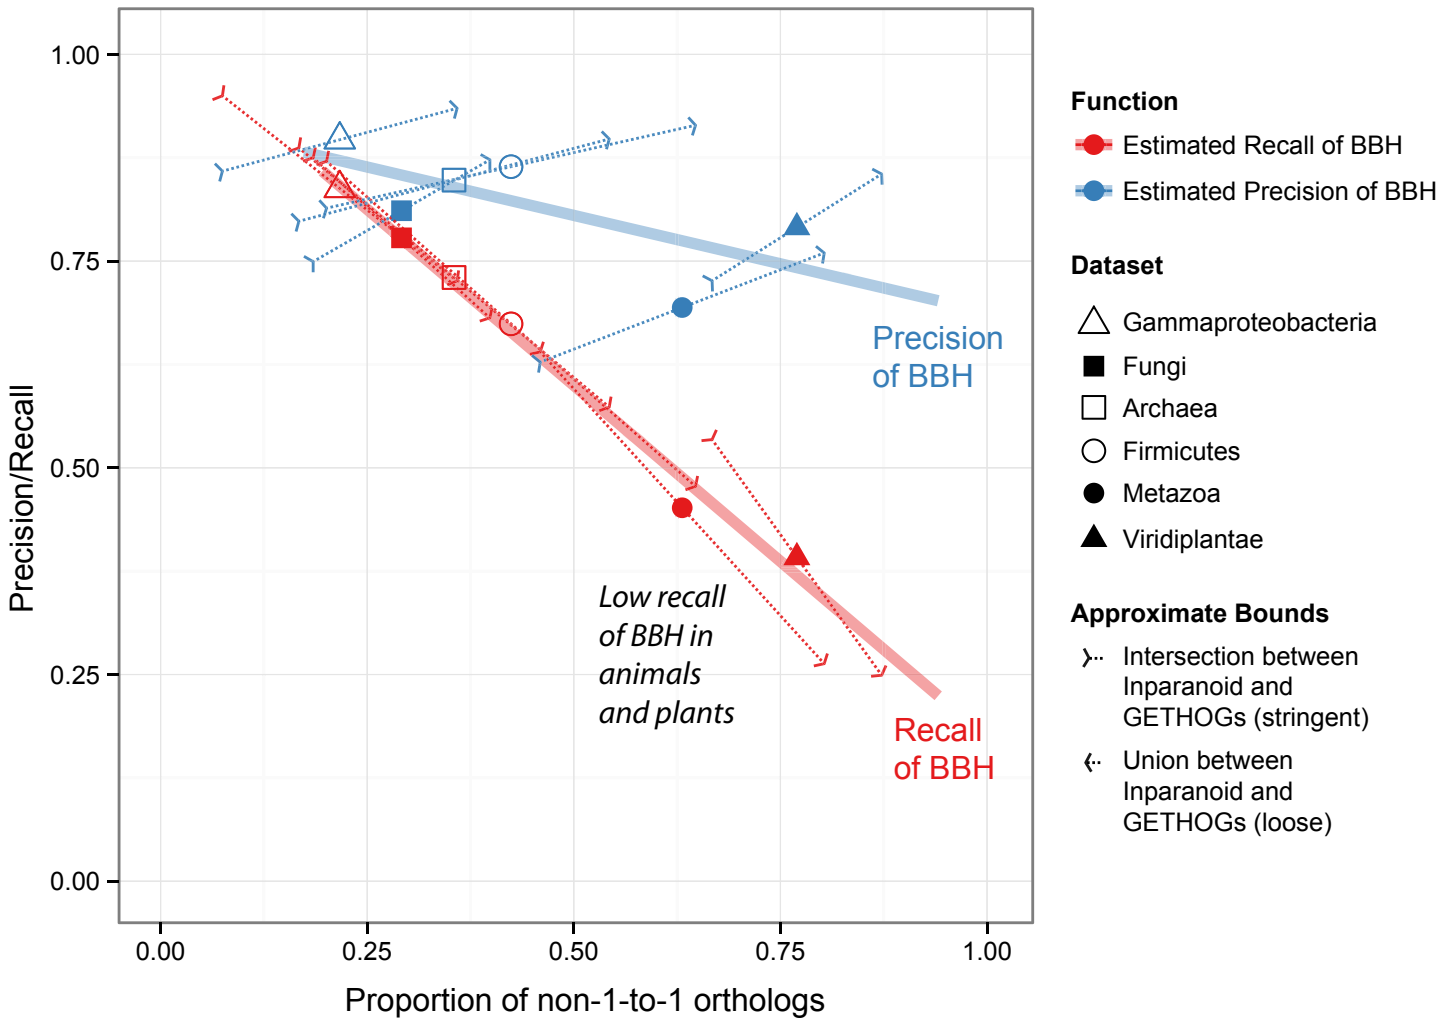

Supplement: supp_evt132_MtoN_PR_realdata_new.pdf [file supp_evt132_MtoN_PR_realdata_new.pdf]

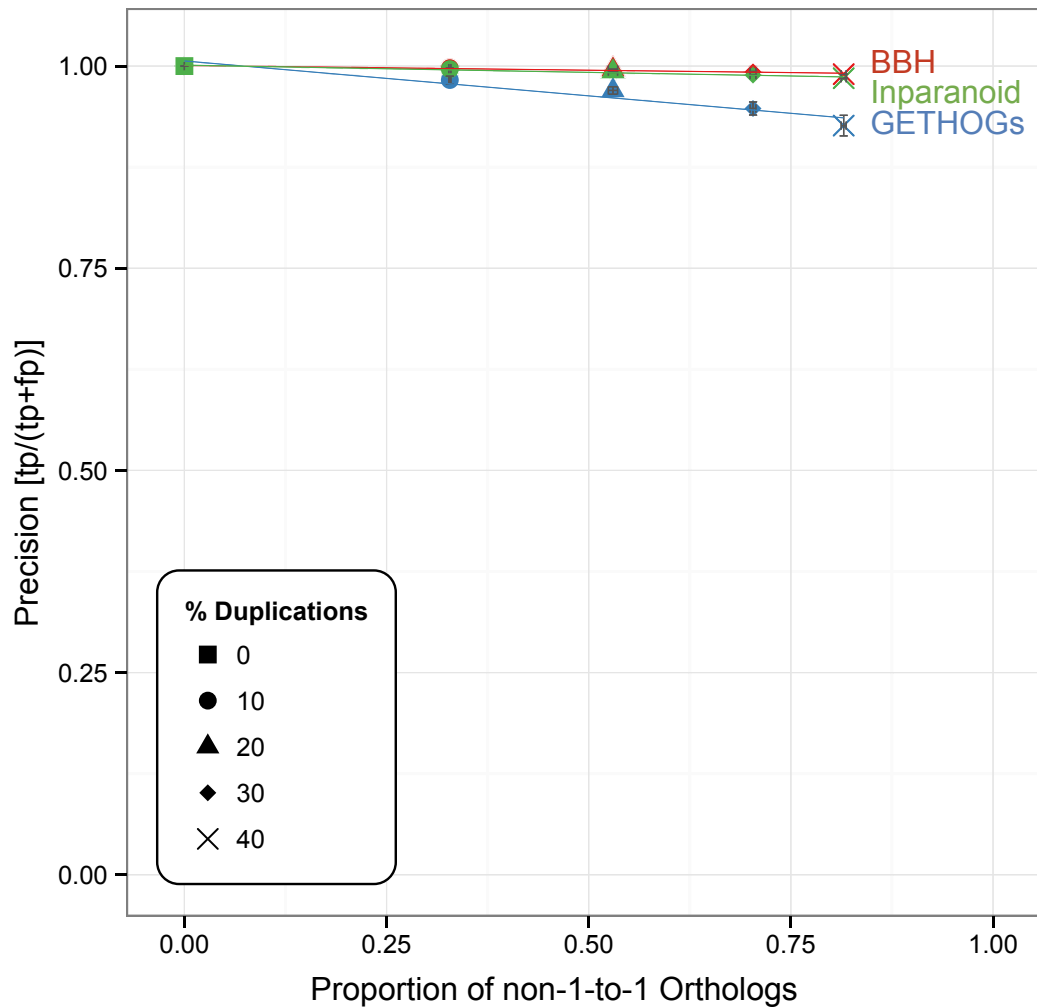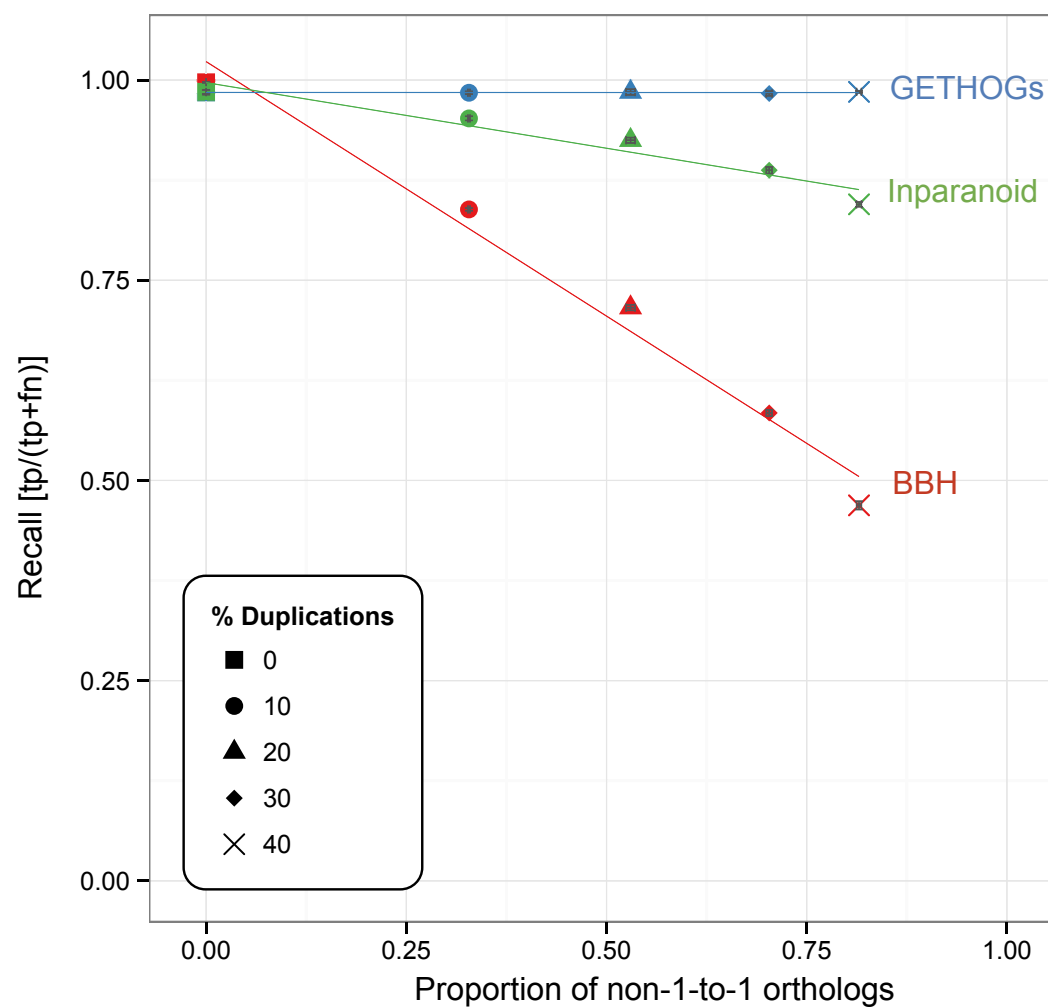

Supplement: supp_evt132_MtoN_PR_simulation.pdf [file supp_evt132_MtoN_PR_simulation.pdf]
